# Supplementary material for: Der Inno-Lehre
Source: Atypon-hosted journal article supplement (doi:10.1026/0012-1924/a000256), 2020-10-01
Supplement: 0012-1924_a000256_esm1.pdf [file 0012-1924_a000256_esm1.pdf]

*Elektronisches Supplement 1. Demografische Angaben*

| Demografische Angaben              | Lehrende ( <i>N</i> = 162)                                                                                                                                                                                                                                                                                                                                      | Studierende ( <i>N</i> = 585)                                                                                                                                                                                                                                                                                                                                         |
|------------------------------------|-----------------------------------------------------------------------------------------------------------------------------------------------------------------------------------------------------------------------------------------------------------------------------------------------------------------------------------------------------------------|-----------------------------------------------------------------------------------------------------------------------------------------------------------------------------------------------------------------------------------------------------------------------------------------------------------------------------------------------------------------------|
| Geschlecht                         | <i>N</i> = 81 Frauen<br><i>N</i> = 81 Männer                                                                                                                                                                                                                                                                                                                    | <i>N</i> = 265 Frauen<br><i>N</i> = 312 Männer                                                                                                                                                                                                                                                                                                                        |
| Durchschnittliches Alter in Jahren | 40                                                                                                                                                                                                                                                                                                                                                              | 23.8                                                                                                                                                                                                                                                                                                                                                                  |
| Rolle an der Hochschule            | Wissenschaftliche Mitarbeiter und Mitarbeiterinnen<br><i>N</i> = 81<br>Professoren und Professorinnen<br><i>N</i> = 16<br>Sonstiges <i>N</i> = 65                                                                                                                                                                                                               | Studierende <i>N</i> = 585                                                                                                                                                                                                                                                                                                                                            |
| Art der Hochschule                 | Universitäten <i>N</i> = 119<br>Fachhochschulen <i>N</i> = 41<br>Fernuniversitäten <i>N</i> = 1<br>Keine Angabe <i>N</i> = 1                                                                                                                                                                                                                                    | Universitäten <i>N</i> = 427<br>Fachhochschulen <i>N</i> = 139<br>Fernuniversitäten <i>N</i> = 15<br>Keine Angabe <i>N</i> = 4                                                                                                                                                                                                                                        |
| Studiengang                        | -                                                                                                                                                                                                                                                                                                                                                               | Bachelor <i>N</i> = 357<br>Master <i>N</i> = 140<br>Andere Studiengänge <i>N</i> = 86<br>Keine Angabe <i>N</i> = 2                                                                                                                                                                                                                                                    |
| Studienrichtung                    | Naturwissenschaften (z. B. Chemie, Mathematik, Physik, Biologie) <i>N</i> = 38<br>Psychologie <i>N</i> = 36<br>Medizin <i>N</i> = 1<br>Technik (Informatik und Ingenieurwesen) <i>N</i> = 47<br>Geistes- und Sozialwissenschaften <i>N</i> = 11<br>Wirtschaftswissenschaften <i>N</i> = 16<br>Jura <i>N</i> = 1<br>Lehramt <i>N</i> = 3<br>Fehlend <i>N</i> = 9 | Naturwissenschaften (z. B. Chemie, Mathematik, Physik, Biologie) <i>N</i> = 69<br>Psychologie <i>N</i> = 45<br>Medizin <i>N</i> = 35<br>Technik (Informatik und Ingenieurwesen) <i>N</i> = 102<br>Geistes- und Sozialwissenschaften <i>N</i> = 96<br>Wirtschaftswissenschaften <i>N</i> = 109<br>Jura <i>N</i> = 43<br>Lehramt <i>N</i> = 34<br>Fehlend <i>N</i> = 52 |
