# Supplementary material for: Der Inno-Lehre
Source: Atypon-hosted journal article supplement (doi:10.1026/0012-1924/a000256), 2020-10-01
Supplement: 0012-1924_a000256_esm2.pdf [file 0012-1924_a000256_esm2.pdf]

Elektronisches Supplement 2. In der Gruppe der Lehrenden eingesetzte Skalen zur Validierung des Inno-Lehre (IL)

| Validierungsskala                                              | Eingesetzte Items                                                                                                                                                                                         | <i>M</i> | <i>SD</i> | Min | Max | $\alpha$ | Originalitem                                                                                                                   |
|----------------------------------------------------------------|-----------------------------------------------------------------------------------------------------------------------------------------------------------------------------------------------------------|----------|-----------|-----|-----|----------|--------------------------------------------------------------------------------------------------------------------------------|
| Organisational Commitments (OCQ-G; Maier & Woschée, 2002)      | An meiner Universität bin ich dazu bereit, mich mehr als nötig in der Lehre zu engagieren.                                                                                                                | 2.50     | 0.98      |     |     |          | Ich bin bereit, mich mehr als nötig zu engagieren, um zum Erfolg des Unternehmens beizutragen.                                 |
|                                                                | Freunden gegenüber lobe ich die Lehre an meiner Universität als besonders gut.                                                                                                                            | 4.09     | 0.81      |     |     |          | Freunden gegenüber lobe ich dieses Unternehmen als besonders guten Arbeitgeber.                                                |
|                                                                | Ich wäre bereit, fast jede durch meine Universität vorgegebene Veränderung zu akzeptieren, nur um weiter lehren zu dürfen.                                                                                | 3.24     | 1.10      |     |     |          | Ich würde fast jede Veränderung meiner Tätigkeit akzeptieren, nur um auch weiterhin für dieses Unternehmen arbeiten zu können. |
|                                                                | Ich bin der Meinung, dass meine Wertvorstellungen und die meiner Universität sehr ähnlich sind.                                                                                                           | 2.25     | 1.05      |     |     |          | Ich bin der Meinung, dass meine Wertvorstellungen und die des Unternehmens sehr ähnlich sind.                                  |
|                                                                | Ich bin stolz, wenn ich anderen sagen kann, dass ich an meiner Universität in der Lehre tätig bin.                                                                                                        | 3.24     | 0.96      | 1   | 5   | .86      | Ich bin stolz, wenn ich anderen sagen kann, dass ich zu diesem Unternehmen gehöre.                                             |
|                                                                | Meine Universität spornt mich zu Höchstleistungen in der Lehre an.                                                                                                                                        | 3.69     | 1.06      |     |     |          | Dieses Unternehmen spornt mich zu Höchstleistungen in meiner Tätigkeit an.                                                     |
|                                                                | Ich bin ausgesprochen froh, dass ich an meiner Universität lehre und nicht an einer anderen.                                                                                                              | 2.73     | 1.16      |     |     |          | Ich bin ausgesprochen froh, dass ich bei meinem Eintritt dieses Unternehmen anderen vorgezogen habe.                           |
|                                                                | Die Zukunft der Lehre an meiner Universität liegt mir sehr am Herzen.                                                                                                                                     | 3.14     | 1.01      |     |     |          | Die Zukunft dieses Unternehmens liegt mir sehr am Herzen.                                                                      |
|                                                                | Ich halte die Lehre an meiner Universität für die beste, die ich mir vorstellen kann                                                                                                                      | 3.88     | 0.97      |     |     |          | Ich halte dieses für das beste aller Unternehmen, die für mich in Frage kommen.                                                |
| Arbeits- beschreibungsbogen (ABB; Neuberger & Allerbeck, 1978) | Bitte nehmen Sie auf den nachfolgenden Seiten Stellung zu Ihrer gegenwärtigen Arbeit in der Lehre (z.B. zu Ihren Kollegen, Arbeitsbedingungen, Gehalt usw.). Äußern Sie dabei bitte Ihre ganz persönliche |          |           |     |     |          |                                                                                                                                |

|                                                                                       |                                                                                                                            |      |      |   |   |                                                                  |
|---------------------------------------------------------------------------------------|----------------------------------------------------------------------------------------------------------------------------|------|------|---|---|------------------------------------------------------------------|
| Meinung. Bitte geben Sie ein durchschnittliches Urteil über Ihre Arbeitssituation an. |                                                                                                                            |      |      |   |   |                                                                  |
|                                                                                       | Wie zufrieden sind Sie mit Ihren Kolleginnen und Kollegen in der Lehre?                                                    | 5.29 | 1.28 | 1 | 7 | ... wie zufrieden sind Sie mit Ihren Kollegen?                   |
|                                                                                       | Wie zufrieden sind Sie mit Ihren Vorgesetzten in der Lehre?                                                                | 4.57 | 1.64 | 1 | 7 | ... wie zufrieden sind Sie mit Ihrem Vorgesetzten?               |
|                                                                                       | Wie zufrieden sind Sie mit Ihrer Lehrtätigkeit? Gemeint ist der Inhalt Ihrer Tätigkeit bzw. die Art Ihrer Arbeitsaufgaben. | 5.61 | 1.05 | 2 | 7 | ... wie zufrieden sind Sie mit Ihrer Tätigkeit?                  |
|                                                                                       | Wie zufrieden sind Sie mit den Arbeitsbedingungen in der Lehre?                                                            | 4.82 | 1.58 | 1 | 7 | .86 ... wie zufrieden sind Sie mit den Arbeitsbedingungen?       |
|                                                                                       | Wie zufrieden sind Sie mit der Organisation und Leitung in der Lehre?                                                      | 4.56 | 1.64 | 1 | 7 | ... wie zufrieden sind Sie mit der Organisation ... und Leitung? |
|                                                                                       | Wie zufrieden sind Sie mit Ihren Entwicklungsmöglichkeiten in der Lehre?                                                   | 4.31 | 1.83 | 1 | 7 | ... wie zufrieden sind Sie mit Ihren Entwicklungsmöglichkeiten?  |
| TIPI (Muck, Hell & Gosling, 2007)                                                     | Ich sehe mich selbst als...                                                                                                |      |      |   |   |                                                                  |
|                                                                                       | <i>Extraversion</i> extravertiert, begeistert.                                                                             | 4.86 | 1.40 | 1 | 7 | .67 <sup>c</sup>                                                 |
|                                                                                       | zurückhaltend, still.                                                                                                      | 4.51 | 1.76 | 1 | 7 |                                                                  |
|                                                                                       | <i>Verträglichkeit</i> kritisch, streitsüchtig.                                                                            | 4.67 | 1.53 | 1 | 7 | .39 <sup>c</sup>                                                 |
|                                                                                       | verständnisvoll, warmherzig.                                                                                               | 5.41 | 1.21 | 2 | 7 |                                                                  |
|                                                                                       | <i>Gewissenhaftigkeit</i> unorganisiert, achtlos.                                                                          | 5.80 | 1.04 | 2 | 7 | .71 <sup>c</sup>                                                 |
|                                                                                       | zuverlässig, selbstdiszipliniert.                                                                                          | 6.05 | 1.21 | 2 | 7 |                                                                  |
|                                                                                       | <i>Neurotizismus</i> ängstlich, leicht aus der Fassung zu bringen.                                                         | 5.52 | 1.31 | 2 | 7 | .66 <sup>c</sup>                                                 |
|                                                                                       | gelassen, emotional stabil.                                                                                                | 5.36 | 1.19 | 2 | 7 |                                                                  |
|                                                                                       | <i>Offenheit für Erfahrungen</i> offen für neue Erfahrungen, vielschichtig.                                                | 5.60 | 1.11 | 2 | 7 | .48 <sup>c</sup>                                                 |
|                                                                                       | konventionell, un kreativ.                                                                                                 | 5.06 | 1.36 | 2 | 7 |                                                                  |

Item in der Originalübersetzung übernommen

---

|                                                                        |                                                                                                                                              |      |      |   |   |     |                                            |
|------------------------------------------------------------------------|----------------------------------------------------------------------------------------------------------------------------------------------|------|------|---|---|-----|--------------------------------------------|
|                                                                        | Bitte geben Sie an, wie sehr die folgenden Aussagen während des letzten Jahres bis heute zutreffen oder nicht zutreffen.                     |      |      |   |   |     |                                            |
|                                                                        | Ich habe Zeit dafür vorgesehen, dass Studierende Konzepte und Ideen meiner Lehrveranstaltung untereinander besprechen können.                | 3.71 | 1.02 |   |   |     |                                            |
|                                                                        | Ich überprüfe in meiner Lehrveranstaltung das sich ändernde Verständnis der Studierenden vom Fach.                                           | 3.67 | 0.98 |   |   |     |                                            |
| Deutsche Version des ATI-R (Johannes, Fendler, Hoppert & Seidel, 2011) | In meiner Lehrveranstaltung schaffe ich Gelegenheiten für die Studierenden, ihre geänderten Vorstellungen über den Lehrstoff zu diskutieren. | 3.21 | 1.71 |   |   |     |                                            |
|                                                                        | In meiner Lehrveranstaltung verwende ich viel Zeit darauf, die inhaltlichen Vorstellungen der Studierenden zu hinterfragen.                  | 3.89 | 1.00 | 1 | 5 | .88 | Item in der Originalübersetzung übernommen |
|                                                                        | In meiner Lehrveranstaltung sehe ich Lehren als Unterstützen der Studierenden beim Entwickeln neuer Gedanken.                                | 3.30 | 1.24 |   |   |     |                                            |
|                                                                        | In meiner Lehrveranstaltung schaffe ich Gelegenheiten für die Studierenden, ihre geänderten Vorstellungen über den Lehrstoff zu diskutieren. | 3.23 | 1.14 |   |   |     |                                            |
|                                                                        | In meiner Lehrveranstaltung finde ich es besser, wenn sich die Studierenden eigene Notizen machen, statt meine zu übernehmen.                | 3.85 | 0.93 |   |   |     |                                            |
|                                                                        | In meiner Lehrveranstaltung verwende ich viel Zeit darauf, die inhaltlichen                                                                  | 3.21 | 1.03 |   |   |     |                                            |

---

---

|                                                                                                                                       |      |      |
|---------------------------------------------------------------------------------------------------------------------------------------|------|------|
| Vorstellungen der Studierenden zu hinterfragen.                                                                                       |      |      |
| In meiner Lehrveranstaltung sehe ich Lehren als Unterstützen der Studierenden beim Entwickeln neuer Gedanken.                         | 3.80 | 0.95 |
| In meiner Lehrveranstaltung unterstütze ich die Studierenden vor allem darin, ihr eigenes Verständnis des Lehrstoffs zu hinterfragen. | 3.71 | 0.94 |
| Meine Lehrveranstaltung soll den Studierenden dabei helfen herauszufinden, wie und womit sie selbst am besten lernen.                 | 3.27 | 1.14 |

---

*Anmerkungen:* Subgruppe der Lehrenden in der Gesamtstichprobe;  $M$  = Mittelwert,  $SD$  = Standardabweichung,  $\alpha$  = Cronbachs Alpha; Listenweise Fallausschluss; ° Es handelt sich hierbei um Korrelationen zwischen den Items.
