# Supplementary material for: Der Inno-Lehre
Source: Atypon-hosted journal article supplement (doi:10.1026/0012-1924/a000256), 2020-10-01
Supplement: 0012-1924_a000256_esm3.pdf [file 0012-1924_a000256_esm3.pdf]

Elektronisches Supplement 3. In der Gruppe der Studierende eingesetzte Skalen zur Validierung des Inno-Lehre (IL)

| Validierungsskala                                                          | Eingesetzte Items                                                                     | <i>M</i>                     | <i>SD</i> | Min  | Max | Cronbachs<br>$\alpha$ | Anpassungen                                      |
|----------------------------------------------------------------------------|---------------------------------------------------------------------------------------|------------------------------|-----------|------|-----|-----------------------|--------------------------------------------------|
| Studienzufriedenheit<br>(Westermann, Heise,<br>Spies & Trautwein,<br>1996) | Ich habe richtig Freude an dem, was ich studiere.                                     | 3.96                         | 0.98      |      |     | .86                   | Items im Original<br>übernommen                  |
|                                                                            | Insgesamt bin ich mit meinem jetzigen Studium zufrieden.                              | 4.01                         | 1.04      |      |     |                       |                                                  |
|                                                                            | Ich finde mein Studium wirklich interessant.                                          | 4.13                         | 0.97      |      |     |                       |                                                  |
|                                                                            | Ich wünsche mir, dass die Studienbedingungen an der Uni<br>besser wären.              | 2.74                         | 1.19      |      |     |                       |                                                  |
|                                                                            | Die äußeren Umstände, unter denen in meinem Fach studiert<br>wird, sind frustrierend. | 3.30                         | 1.29      | 1    | 5   |                       |                                                  |
|                                                                            | Es wird an meiner Uni zu wenig auf die Belange der<br>Studierenden geachtet.          | 3.17                         | 1.21      |      |     |                       |                                                  |
|                                                                            | Ich kann mein Studium nur schwer mit anderen<br>Verpflichtungen in Einklang bringen.  | 3.27                         | 1.29      |      |     |                       |                                                  |
|                                                                            | Das Studium frisst mich auf.                                                          | 3.47                         | 1.26      |      |     |                       |                                                  |
| Ich fühle mich durch das Studium oft müde und abgespannt.                  | 3.07                                                                                  | 1.32                         |           |      |     |                       |                                                  |
| Leistungszufriedenheit<br>(Burger & Groß, 2016)                            | Meine Leistungen im Studium sind besser, als ich<br>ursprünglich erwartet hatte.      | 4.52                         | 1.64      |      |     | .91                   | Items im Original<br>übernommen                  |
|                                                                            | Meine Leistungserwartungen und -ansprüche haben sich im<br>Studium voll erfüllt.      | 4.55                         | 1.64      | 1    | 7   |                       |                                                  |
|                                                                            | Mit meiner Studienleistung bin ich zufrieden.                                         | 4.88                         | 1.66      |      |     |                       |                                                  |
| TIPI<br>(Muck, Hell & Gosling,<br>2007)                                    | Ich sehe mich selbst als...                                                           |                              |           |      |     |                       |                                                  |
|                                                                            | <i>Extraversion</i>                                                                   | extravertiert, begeistert.   | 4.69      | 1.46 |     |                       | Item in der<br>Originalübersetzung<br>übernommen |
|                                                                            |                                                                                       | zurückhaltend, still.        | 4.07      | 1.76 |     |                       |                                                  |
|                                                                            | <i>Verträglichkeit</i>                                                                | kritisch, streitsüchtig.     | 4.69      | 1.64 | 1   | 7                     |                                                  |
|                                                                            |                                                                                       | verständnisvoll, warmherzig. | 5.49      | 1.14 |     |                       |                                                  |
|                                                                            | <i>Gewissenhaftigkeit</i>                                                             | unorganisiert, achtlos.      | 5.17      | 1.38 |     |                       |                                                  |
|                                                                            | zuverlässig, selbstdiszipliniert.                                                     | 5.13                         | 1.59      |      |     |                       |                                                  |

| Validierungsskala                    | Eingesetzte Items                             | <i>M</i> | <i>SD</i> | Min | Max | Cronbachs<br>$\alpha$ | Anpassungen |
|--------------------------------------|-----------------------------------------------|----------|-----------|-----|-----|-----------------------|-------------|
| <i>Neurotizismus</i>                 | ängstlich, leicht aus der Fassung zu bringen. | 4.83     | 1.65      |     |     | .63 <sup>a</sup>      |             |
|                                      | gelassen, emotional stabil.                   | 4.90     | 1.41      |     |     |                       |             |
| <i>Offenheit für<br/>Erfahrungen</i> | offen für neue Erfahrungen, vielschichtig.    | 5.47     | 1.14      |     |     | .40 <sup>a</sup>      |             |
|                                      | konventionell, un kreativ.                    | 4.91     | 1.53      |     |     |                       |             |

*Anmerkungen:* Subgruppe der Studierenden in der Gesamtstichprobe; *M* = Mittelwert, *SD* = Standardabweichung; Listenweise Fallausschluss; <sup>a</sup> Es handelt sich hierbei um Korrelationen zwischen den Items.
