# Supplementary material for: Der Inno-Lehre
Source: Atypon-hosted journal article supplement (doi:10.1026/0012-1924/a000256), 2020-10-01
Supplement: 0012-1924_a000256_esm4.pdf [file 0012-1924_a000256_esm4.pdf]

Elektronisches Supplement 4. Übersicht der Item- und Skalenstatistik des Inno-Lehre (IL)

| Nr. | Faktor                           | Kürzel | $M^a$ | $SD^a$ | Min <sup>a</sup> | Max <sup>a</sup> | $\alpha^a$ | $r^a$ | $p_i^a$ | Standardisierte<br>Ladungen <sup>b</sup><br>Modell B | Standardisierte<br>Ladungen <sup>b</sup><br>Modell<br>B_ohne UF | DEV <sup>b</sup> | KR <sup>b</sup> |  |
|-----|----------------------------------|--------|-------|--------|------------------|------------------|------------|-------|---------|------------------------------------------------------|-----------------------------------------------------------------|------------------|-----------------|--|
| 1   | Wertschätzung von Lehre          | ws11   | 3.40  | 1.01   |                  |                  |            | .69   | .22     | .72                                                  | .72                                                             |                  |                 |  |
|     |                                  | ws1    | 3.36  | 1.03   | 1                | 5                | .81        | .63   | .27     | .72                                                  | .72                                                             | .5               | .7              |  |
|     |                                  | ws10   | 3.53  | 0.97   |                  |                  |            |       | .65     | .42                                                  | .74                                                             | .74              |                 |  |
| 2   | Beziehungsqualität               | bq3    | 3.69  | 0.94   |                  |                  |            | .73   | .58     | .70                                                  | .70                                                             |                  |                 |  |
|     |                                  | bq5    | 3.95  | 0.91   | 1                | 5                | .86        | .73   | .64     | .80                                                  | .80                                                             | .6               | .7              |  |
|     |                                  | bq6    | 3.91  | 0.89   |                  |                  |            |       | .73     | .66                                                  | .82                                                             | .82              |                 |  |
| 3   | Vernetzung in der Lehre          | vn1    | 3.61  | 1.03   |                  |                  |            | .58   | .55     | .63                                                  | .63                                                             |                  |                 |  |
|     |                                  | vn8    | 3.46  | 1.07   | 1                | 5                | .76        | .60   | .50     | .74                                                  | .75                                                             | .5               | .7              |  |
|     |                                  | vn5    | 3.43  | 1.09   |                  |                  |            |       | .61     | .50                                                  | .74                                                             | .74              |                 |  |
| 4   | Aktivierende Führung             | af9    | 3.44  | 0.95   |                  |                  |            | .73   | .37     | .83                                                  | .83                                                             |                  |                 |  |
|     |                                  | af8    | 3.48  | 0.92   | 1                | 5                | .84        | .71   | .35     | .81                                                  | .81                                                             | .6               | .7              |  |
|     |                                  | af5    | 3.25  | 0.99   |                  |                  |            |       | .69     | .30                                                  | .72                                                             | .72              |                 |  |
| 5   | Mobiles Lernen                   | dt5    | 3.49  | 1.16   |                  |                  |            | .71   | .59     | .77                                                  | .77                                                             |                  |                 |  |
|     |                                  | dt4    | 3.57  | 1.10   | 1                | 5                | .83        | .68   | .61     | .82                                                  | .82                                                             | .6               | .7              |  |
|     |                                  | dt6    | 3.36  | 1.17   |                  |                  |            |       | .69     | .48                                                  | .79                                                             | .79              |                 |  |
| 6   | Individualisiertes Lernen        | dt14   | 3.00  | 1.26   | 1                | 5                | .70        | .53   | .47     | .68                                                  | .68                                                             | .5               | .6              |  |
|     |                                  | dt13   | 3.23  | 1.18   |                  |                  |            |       | .51     | .74                                                  | .74                                                             |                  |                 |  |
|     |                                  | ql3    | 3.42  | 0.97   |                  |                  |            |       | .57     | .46                                                  | .65                                                             | .65              |                 |  |
| 7   | Qualifizierung in der Lehre      | ql1    | 3.29  | 1.02   | 1                | 5                | .78        | .66   | .47     | .70                                                  | .70                                                             | .5               | .7              |  |
|     |                                  | ql8    | 3.30  | 1.04   |                  |                  |            |       | .63     | .37                                                  | .80                                                             | .80              |                 |  |
|     |                                  | dt9    | 3.62  | 1.02   |                  |                  |            |       | .69     | .62                                                  | .80                                                             | .80              |                 |  |
| 8   | Forschungsorientiertes<br>Lernen | dt10   | 3.48  | 1.11   | 1                | 5                | .81        | .63   | .55     | .75                                                  | .75                                                             | .6               | .7              |  |
|     |                                  | dt8    | 3.63  | 1.04   |                  |                  |            |       | .66     | .63                                                  | .80                                                             | .80              |                 |  |
|     |                                  | ref10  | 3.68  | 0.99   |                  |                  |            |       | .66     | .53                                                  | .82                                                             | .78              |                 |  |
| 9   | Reflexion Studierende            | ref7   | 3.71  | 0.98   | 1                | 5                | .79        | .66   | .58     | .81                                                  | .85                                                             | .7               | .6              |  |
|     |                                  | ipi4r  | 3.38  | 1.13   | 1                | 5                | .74        | .60   | .31     | .87                                                  | -                                                               |                  |                 |  |
| 10  | Umgang mit Fehlern               | ipi5r  | 3.34  | 1.11   |                  |                  |            | .60   | .34     | .60                                                  | -                                                               | .6               | .6              |  |

| Nr. | Faktor             | Kürzel | $M^a$ | $SD^a$ | Min <sup>a</sup> | Max <sup>a</sup> | $\alpha^a$ | $r^a$ | $p_i^a$ | Standardisierte<br>Ladungen <sup>b</sup><br>Modell B | Standardisierte<br>Ladungen <sup>b</sup><br>Modell<br>B_ohne UF | DEV <sup>b</sup> | KR <sup>b</sup> |
|-----|--------------------|--------|-------|--------|------------------|------------------|------------|-------|---------|------------------------------------------------------|-----------------------------------------------------------------|------------------|-----------------|
| 11  | Ziele in der Lehre | zl1    | 3.83  | 0.91   | 1                | 5                | .72        | .57   | .50     | .76                                                  | .75                                                             | .6               | .6              |
|     |                    | zl6    | 3.67  | 0.91   |                  |                  |            |       |         | .79                                                  | .80                                                             |                  |                 |
|     |                    | ref9   | 3.37  | 0.98   |                  |                  |            |       |         | .81                                                  | .81                                                             |                  |                 |
| 12  | Reflexion Lehrende | ref6   | 3.28  | 1.06   | 1                | 5                | .82        | .69   | .36     | .79                                                  | .79                                                             | .6               | .5              |
|     |                    | ref2   | 3.35  | 1.04   |                  |                  |            |       |         | .77                                                  | .77                                                             |                  |                 |

*Anmerkungen:*  $M$  = Mittelwert,  $SD$  = Standardabweichung,  $\alpha$  = Cronbachs  $\alpha$  für die Drei-Item Skalen (in den Zwei-Item Skalen ist die Korrelation der Items angegeben),  $r$  = Trennschärfe,  $p_i^a$  = Itemschwierigkeit in der ersten Stichprobe<sup>a</sup>, DEV = Durchschnittliche erfasste Varianz, KR = Kongenerische Reliabilität, <sup>a</sup> Primär-Stichprobe, <sup>b</sup> Sekundär-Stichprobe.
