# Supplementary material for: Der Inno-Lehre
Source: Atypon-hosted journal article supplement (doi:10.1026/0012-1924/a000256), 2020-10-01
Supplement: 0012-1924_a000256_esm5.pdf [file 0012-1924_a000256_esm5.pdf]

Elektronisches Supplement 5. Übersicht zu den Faktoren und Items des Inno-Lehre (IL)

| Nr. | Faktor                  | Kürzel | Item: An unserer Universität...                                                                                                                            | Herkunft der Items                                                                                                                                      |
|-----|-------------------------|--------|------------------------------------------------------------------------------------------------------------------------------------------------------------|---------------------------------------------------------------------------------------------------------------------------------------------------------|
| 1   | Wertschätzung           | ws11   | schätzen die Lehrenden die Umsetzung exzellenter Lehrkonzepte als wichtig ein.                                                                             | Eigenkonstruktion angelehnt an: „Meine Universität erachtet die Lehre als wichtig.“<br>Aus: Gebhardt (2012)                                             |
|     |                         | ws1    | erhalten die Lehrenden durch Kollegen und Vorgesetzte Anerkennung für innovative Lehrkonzepte.                                                             | Eigenkonstruktion angelehnt an: „Es gibt an meiner Universität Anreize, Innovationen in der Lehre einzusetzen.“<br>Aus: Gebhardt (2012)                 |
|     |                         | ws10   | ist es den Lehrenden wichtig, ihre Lehre weiterzuentwickeln.                                                                                               | Eigenkonstruktion angelehnt an: „Meine Universität erachtet die Lehre als wichtig.“<br>Aus: Gebhardt (2012)                                             |
| 2   | Beziehungsqualität      | bq3    | vertrauen sich Lehrende und Studierende gegenseitig.                                                                                                       | Eigenkonstruktion angelehnt an: „I trust my teacher.“<br>Aus: Davis (2001)                                                                              |
|     |                         | bq5    | achten Lehrende und Studierende einander.                                                                                                                  | Eigenkonstruktion angelehnt an: „Mein/e Therapeut/in und ich achten einander.“<br>Aus: Wilmers et al. (2008)                                            |
|     |                         | bq6    | schätzen sich Lehrende und Studierende gegenseitig.                                                                                                        | Eigenkonstruktion angelehnt an: „Ich spüre, dass mein/e Therapeut/in mich schätzt.“<br>Aus: Wilmers et al. (2008)                                       |
| 3   | Vernetzung in der Lehre | vn1    | profitieren die Studierenden durch externe Partnerschaften ihrer Lehrenden (z.B. durch Praktikums- oder Hilfskraftstellen).                                | Eigenkonstruktion angelehnt an: „Ich übernehme ehrenamtliche Tätigkeiten, die mir auch beruflich nützlich sein könnten.“<br>Aus: Wolff und Moser (2006) |
|     |                         | vn8    | werden Kontakte zu außeruniversitären Einrichtungen gepflegt, damit in den Lehrveranstaltungen aktuelle gesellschaftliche Themen besprochen werden können. | Eigenkonstruktion angelehnt an: „Diskussionspapier Gute Lehre“.<br>Aus: Kauffeld (2017)                                                                 |

| Nr. | Faktor               | Kürzel | Item: An unserer Universität...                                                                                                                           | Herkunft der Items                                                                                                                                                                                                                                                                                                                                                                                                                                                      |
|-----|----------------------|--------|-----------------------------------------------------------------------------------------------------------------------------------------------------------|-------------------------------------------------------------------------------------------------------------------------------------------------------------------------------------------------------------------------------------------------------------------------------------------------------------------------------------------------------------------------------------------------------------------------------------------------------------------------|
|     |                      | vn5    | profitiert die Lehre von der Zusammenarbeit mit international operierenden Organisationen (z.B. Unternehmen, Forschungseinrichtungen).                    | <p>Eigenkonstruktion angelehnt an: „Memorandum: Gesellschaftliche Verantwortung an Hochschulen.“<br/>Aus: Hochschulnetzwerk Bildung durch Verantwortung (2013)</p> <p>Eigenkonstruktion angelehnt an: „Diskussionspapier Gute Lehre“.<br/>Aus: Kauffeld (2017)</p> <p>Eigenkonstruktion angelehnt an: „Ich baue inoffizielle Kontakte zu Personen außerhalb meines Betriebes auf, um dort persönliche Ansprechpartner zu besitzen.“<br/>Aus: Wolff und Moser (2006)</p> |
|     |                      | af9    | unterstützen die Professorinnen und Professoren ihre Mitarbeiterinnen und Mitarbeiter, wenn diese Vorschläge für die Gestaltung von Studiengängen machen. | <p>Eigenkonstruktion angelehnt an: „Mein Vorgesetzter unterstützt mich, wenn ich einen Verbesserungsvorschlag habe.“<br/>Aus: Kauffeld et al. (2004)</p> <p>Eigenkonstruktion angelehnt an: „Als Dozent/in werde ich seitens meiner Universität dazu aufgefordert, mich an der Gestaltung und Entwicklung von Studiengängen auf Programmebene zu beteiligen.“<br/>Aus: Gebhardt (2012)</p>                                                                              |
| 4   | Aktivierende Führung | af8    | unterstützen die Professorinnen und Professoren ihre Mitarbeiterinnen und Mitarbeiter, wenn diese Vorschläge für eine bessere Lehrgestaltung machen.      | <p>Eigenkonstruktion angelehnt an: „Mein Vorgesetzter unterstützt mich, wenn ich einen Verbesserungsvorschlag habe.“<br/>Aus: Kauffeld et al. (2004)</p>                                                                                                                                                                                                                                                                                                                |
|     |                      | af5    | regen Professorinnen und Professoren ihre Mitarbeiterinnen und Mitarbeiter dazu an, Verbesserungsvorschläge im Bereich der Lehre zu machen.               | <p>Eigenkonstruktion angelehnt an: „Unser Vorgesetzter fordert uns auf, Verbesserungsvorschläge zu machen.“<br/>Aus: Kauffeld et al. (2004)</p> <p>Eigenkonstruktion angelehnt an: „Als Dozent/in werde ich seitens meiner Universität dazu aufgefordert, mich an der Gestaltung und Entwicklung von Studiengängen auf Programmebene zu beteiligen.“<br/>Aus: Gebhardt (2012)</p>                                                                                       |

| Nr. | Faktor                      | Kürzel | Item: An unserer Universität...                                                                                                                                                                                 | Herkunft der Items                                                                                                                                                                                                                                    |
|-----|-----------------------------|--------|-----------------------------------------------------------------------------------------------------------------------------------------------------------------------------------------------------------------|-------------------------------------------------------------------------------------------------------------------------------------------------------------------------------------------------------------------------------------------------------|
| 5   | Mobiles Lernen              | dt5    | können die Studierenden durch den sinnvollen Einsatz verschiedener Lehrmethoden (z.B. mobiles Lernen) zeit- und ortsunabhängig lernen.                                                                          | Eigenkonstruktion angelehnt an: „Strategiepapier zu Medien an der Technischen Universität Braunschweig“<br>Aus: Technische Universität Braunschweig (2016)                                                                                            |
|     |                             | dt4    | fördert der Einsatz von Medien, die ein räumlich und zeitlich flexibles Lernen erlauben, den Lernprozess der Studierenden.                                                                                      | Eigenkonstruktion angelehnt an: „Diskussionspapier Gute Lehre“.<br>Aus: Kauffeld (2017)                                                                                                                                                               |
|     |                             | dt6    | wird das orts- und zeitunabhängige Lernen der Studierenden durch den Einsatz verschiedener sozialer Medien in der Lehre erleichtert.                                                                            |                                                                                                                                                                                                                                                       |
| 6   | Individualisiertes Lernen   | dt14   | werden Methoden (z.B. Planspiele, Simulationen, Game-Based-Learning) eingesetzt, die das Erreichen des Lernziels auf unterschiedlichen Lernwegen und in unterschiedlichen Lernszenarien ermöglichen.            | Eigenkonstruktion angelehnt an: „Strategiepapier zu Medien an der Technischen Universität Braunschweig“<br>Aus: Technische Universität Braunschweig (2016)<br>Eigenkonstruktion angelehnt an: „Diskussionspapier Gute Lehre“.<br>Aus: Kauffeld (2017) |
|     |                             | dt13   | wissen die Lehrenden, wie sie das selbstständige Lernen der Studierenden durch den gezielten Einsatz von didaktischen Methoden (z.B. Gruppenpuzzle, Hausübung mit Feedback, Inverted Classroom) fördern können. | Eigenkonstruktion angelehnt an: „Teachers make use of methodologies which encourage students' autonomous learning.“<br>Aus: Gonzales-Lopes (2006)                                                                                                     |
| 7   | Qualifizierung in der Lehre | ql3    | können die Lehrenden hochschuldidaktische Qualifizierungsmaßnahmen in ihren Arbeitsalltag integrieren.                                                                                                          | Eigenkonstruktion                                                                                                                                                                                                                                     |
|     |                             | ql1    | werden die Lehrenden durch vielfältige hochschuldidaktische Qualifizierungsmaßnahmen individuell in ihrer Lehrkompetenz gefördert.                                                                              | Eigenkonstruktion, angelehnt an: „Die Universität unterstützt die Dozierenden in ihren Lehraktivitäten durch ein umfangreiches Angebot an hochschuldidaktischen Weiterbildungsmaßnahmen.“<br>Aus: Gebhardt (2012)                                     |
|     |                             | ql8    | bilden sich die Lehrenden weiter, um neueste Lehrmethoden in ihrer Lehre umzusetzen.                                                                                                                            | Eigenkonstruktion                                                                                                                                                                                                                                     |

| Nr. | Faktor                        | Kürzel | Item: An unserer Universität...                                                                                                                         | Herkunft der Items                                                                                                                                                                                                                                         |
|-----|-------------------------------|--------|---------------------------------------------------------------------------------------------------------------------------------------------------------|------------------------------------------------------------------------------------------------------------------------------------------------------------------------------------------------------------------------------------------------------------|
| 8   | Forschungsorientiertes Lernen | dt9    | erwerben die Studierenden durch die Verknüpfung von Lehre und Forschung ein tieferes Verständnis über aktuelle Forschungsmethoden.                      | Eigenkonstruktion, angelehnt an: „Gute Lehre vermittelt immer auch neueste wissenschaftliche Erkenntnisse und Forschungsmethoden.“<br>Aus: Schwab, Kowatz und Gasteiger-Klicpera (2015)                                                                    |
|     |                               | dt10   | erwerben die Studierenden durch die Einbindung von Forschungsprojekten in der Lehre fundierte Kenntnisse über wissenschaftliches Arbeiten.              | Eigenkonstruktion, angelehnt an: „Im Rahmen der LVs (Lehrveranstaltungen) im Studium wird von Seiten des Lehrenden sehr viel Wert auf die Einbindung praktischer Forschung in den Unterricht gelegt.“<br>Aus: Schwab, Kowatz und Gasteiger-Klicpera (2015) |
|     |                               | dt8    | entwickeln die Studierenden durch eine forschungsorientierte Lehre ein Verständnis für die Bedeutung wissenschaftlicher Standards.                      | Eigenkonstruktion, angelehnt an die gegenteilige Bedeutung des Items: „Ich sehe die Einbindung von Forschung in die Lehre allgemein als unwichtig an.“<br>Aus: Schwab, Kowatz und Gasteiger-Klicpera (2015)                                                |
| 9   | Reflexion Studierende         | ref10  | machen sich die Studierenden gemeinsam Gedanken darüber, was in der Lehre gut läuft und ausgebaut werden sollte (z.B. in Fachschaften).                 | Eigenkonstruktion, angepasst an: „Wir machen uns Gedanken darüber, was bei uns gut läuft und ausgebaut werden sollte.“<br>Aus: Kauffeld et al. (2004)                                                                                                      |
|     |                               | ref7   | machen sich die Studierenden gemeinsam Gedanken darüber, was in Lehrveranstaltungen schlecht läuft und verbessert werden könnte (z.B. in Fachschaften). | Eigenkonstruktion, angepasst an: „Wir machen uns Gedanken darüber, was schlecht läuft und verbessert werden könnte.“<br>Aus: Kauffeld et al. (2004)                                                                                                        |
| 10  | Umgang mit Fehlern            | ipi4r  | wird versucht lehrbezogene Probleme unter den Tisch zu kehren.                                                                                          | Eigenkonstruktion, angepasst an: Bei uns wird versucht, Fehler unter den Tisch zu kehren.“<br>Aus: Kauffeld et al. (2004)                                                                                                                                  |

| Nr. | Faktor             | Kürzel | Item: An unserer Universität...                                                                                          | Herkunft der Items                                                                                                                                                                          |
|-----|--------------------|--------|--------------------------------------------------------------------------------------------------------------------------|---------------------------------------------------------------------------------------------------------------------------------------------------------------------------------------------|
|     |                    | ipi5r  | sind Gespräche über lehrbezogene Schwierigkeiten meistens mit einer Schuldzuweisung verbunden.                           | Eigenkonstruktion, angepasst an: „Wenn wir über Fehler sprechen, ist dies meist mit einer Schuldzuweisung verbunden.“<br>Aus: Kauffeld et al. (2004)                                        |
| 11  | Ziele in der Lehre | zl1    | sind sich die Lehrenden im Klaren über die Ziele in der Lehre (z.B. in den Lehrveranstaltungen).                         | Eigenkonstruktion, angelehnt an: „Was denken Sie, inwieweit sind die Ziele Ihres Teams den anderen Teammitgliedern klar und deutlich gegenwärtig?“<br>Aus: Brodbeck, Anderson & West (2000) |
|     |                    | zl6    | werden nützliche und angemessene Ziele für die Lehre definiert.                                                          | Eigenkonstruktion, angelehnt an: „Was denken Sie, inwieweit sind diese Ziele für das Unternehmen von Bedeutung?“<br>Aus: Brodbeck, Anderson & West (2000)                                   |
| 12  | Reflexion Lehrende | ref9   | machen sich Lehrende gemeinsam Gedanken darüber, was in der Lehre gut läuft und ausgebaut werden sollte.                 | Eigenkonstruktion, angepasst an: Wir machen uns Gedanken darüber, was bei uns gut läuft und ausgebaut werden sollte.“<br>Aus: Kauffeld et al. (2004)                                        |
|     |                    | ref6   | machen sich Lehrende gemeinsam Gedanken darüber, was in Lehrveranstaltungen schlecht läuft und verbessert werden könnte. | Eigenkonstruktion, angepasst an: „Wir machen uns Gedanken darüber, was schlecht läuft und verbessert werden könnte.“<br>Aus: Kauffeld et al. (2004)                                         |
|     |                    | ref2   | denken die Lehrenden viel darüber nach, wie sie ihre Lehrveranstaltungen verbessern können.                              | Eigenkonstruktion, angepasst an: „Meine Kollegen und ich denken ständig über Verbesserungen nach.“<br>Aus: Kauffeld et al. (2004)                                                           |
