# Supplementary material for: Der Inno-Lehre
Source: Atypon-hosted journal article supplement (doi:10.1026/0012-1924/a000256), 2020-10-01
Supplement: 0012-1924_a000256_esm6.pdf [file 0012-1924_a000256_esm6.pdf]

Elektronisches Supplement 6. Analyse der Faktoren des Inno-Lehre

(IL) Tabelle E1. Bivariate Korrelation der IL-Subskalen

| Skala | 1          | 2     | 3     | 4          | 5     | 6     | 7     | 8     | 9     | 10    | 11    | 12  |
|-------|------------|-------|-------|------------|-------|-------|-------|-------|-------|-------|-------|-----|
| 1     | 1.0        |       |       |            |       |       |       |       |       |       |       |     |
| 2     | .51**      | 1.0   |       |            |       |       |       |       |       |       |       |     |
| 3     | .58**      | .48** | 1.0   |            |       |       |       |       |       |       |       |     |
| 4     | .62**      | .49** | .54** | 1.0        |       |       |       |       |       |       |       |     |
|       | (Modell C) |       |       |            |       |       |       |       |       |       |       |     |
| 5     | .48**      | .40** | .38** | .41**      | 1.0   |       |       |       |       |       |       |     |
| 6     | .56**      | .45** | .49** | .51**      | .54** | 1.0   |       |       |       |       |       |     |
| 7     | .63**      | .42** | .43** | .53**      | .46** | .55** | 1.0   |       |       |       |       |     |
|       | (Modell D) |       |       |            |       |       |       |       |       |       |       |     |
| 8     | .44**      | .39** | .46** | .43**      | .44** | .49** | .41** | 1.0   |       |       |       |     |
| 9     | .28**      | .30** | .24** | .35**      | .25** | .22** | .20** | .25** | 1.0   |       |       |     |
| 10    | .21**      | .29** | .14** | .22**      | .23** | .20** | .15** | .15** | .04   | 1.0   |       |     |
| 11    | .46**      | .52** | .42** | .46**      | .45** | .42** | .36** | .35** | .24** | .33** | 1.0   |     |
| 12    | .62**      | .51** | .50** | .73**      | .38** | .51** | .49** | .41** | .35** | .26** | .40** | 1.0 |
|       | (Modell E) |       |       | (Modell F) |       |       |       |       |       |       |       |     |

Anmerkungen: Sekundär-Stichprobe ( $N = 295$ ); \* $p \leq .05$ ., \*\* $p \leq .01$ ., \*\*\* $p \leq .001$ ; Listenweise Fallausschluss; Einseitig getestet mit Spearman- $\rho$ .

Tabelle E2. Latente Faktorkorrelationen der IL Subskalen

| Skala | 1                    | 2                    | 3                    | 4                    | 5                     | 6                     | 7                     | 8      | 9      | 10     | 11                    | 12  |
|-------|----------------------|----------------------|----------------------|----------------------|-----------------------|-----------------------|-----------------------|--------|--------|--------|-----------------------|-----|
| 1     | 1.0                  |                      |                      |                      |                       |                       |                       |        |        |        |                       |     |
| 2     | .65***<br>(Modell G) | 1.0                  |                      |                      |                       |                       |                       |        |        |        |                       |     |
| 3     | .81***<br>(Modell H) | .63***<br>(Modell K) | 1.0                  |                      |                       |                       |                       |        |        |        |                       |     |
| 4     | .82***<br>(Modell C) | .64***<br>(Modell L) | .61***<br>(Modell Q) | 1.0                  |                       |                       |                       |        |        |        |                       |     |
| 5     | .58***               | .45***               | .52***               | .45***               | 1.0                   |                       |                       |        |        |        |                       |     |
| 6     | .78***<br>(Modell I) | .67***<br>(Modell M) | .73***<br>(Modell R) | .62**<br>(Modell V)  | .78***<br>(Modell Y)  | 1.0                   |                       |        |        |        |                       |     |
| 7     | .84***<br>(Modell D) | .60***<br>(Modell N) | .61***<br>(Modell S) | .65***<br>(Modell W) | .61***<br>(Modell Z)  | .77***<br>(Modell AB) | 1.0                   |        |        |        |                       |     |
| 8     | .50***               | .44***               | .51***               | .46***               | .48***                | .60***<br>(Modell AC) | .45***                | 1.0    |        |        |                       |     |
| 9     | .38***               | .38***               | .29**                | .40***               | .31***                | .33***                | .28**                 | .28**  | 1.0    |        |                       |     |
| 10    | .32***               | .35***               | .26**                | .34***               | .33***                | .35***                | .25**                 | .17    | .036   | 1.0    |                       |     |
| 11    | .65***<br>(Modell J) | .63***<br>(Modell O) | .60***<br>(Modell T) | .66***<br>(Modell X) | .68***<br>(Modell AA) | .60***<br>(Modell AD) | .55***                | .42*** | .28**  | .50*** | 1.0                   |     |
| 12    | .81***<br>(Modell E) | .66***<br>(Modell P) | .61***<br>(Modell U) | .85***<br>(Modell F) | .47***                | .71***<br>(Modell AE) | .67***<br>(Modell AF) | .50*** | .46*** | .37*** | .63***<br>(Modell AG) | 1.0 |

Anmerkungen: Latente Faktorkorrelationen. \* $p \leq .05$ , \*\* $p \leq .01$ , \*\*\* $p \leq .001$ .

Tabelle E3. Model-Fit Berechnungen

| Modell              | Anzahl an | $\chi^2$  | p-Wert $\chi^2$ | df  | $\chi^2/df$ | CFI   | RMSEA | SRMR  | BIC        |
|---------------------|-----------|-----------|-----------------|-----|-------------|-------|-------|-------|------------|
| A                   | 1         | 1 235.650 | .000            | 464 | 2.66        | 0.729 | 0.085 | 0.075 | 19 519.219 |
| B                   | 12        | 434.974   | .098            | 398 | 1.09        | 0.987 | 0.020 | 0.038 | 18 929.239 |
| B ohne UF           | 11        | 379.529   | .133            | 350 | 1.08        | 0.989 | 0.019 | 0.038 | 17 113.766 |
| B ohne REFL         | 11        | 362.586   | .059            | 322 | 1.13        | 0.983 | 0.023 | 0.039 | 16 841.162 |
| B ohne UF ohne REFL | 10        | 310.039*  | .098            | 288 | 1.08        | 0.987 | 0.022 | 0.039 | 15 539.374 |
| C                   | 11        | 486.780   | .0048           | 409 | 1.190       | 0.973 | 0.029 | 0.041 | 18 454.284 |
| C ohne UF           | 10        | 430.682   | .0061           | 360 | 1.196       | 0.974 | 0.029 | 0.042 | 17 154.583 |
| C ohne REFL         | 10        | 413.861   | .0015           | 332 | 1.247       | 0.967 | 0.033 | 0.042 | 16 881.079 |
| C ohne UF ohne REFL | 9         | 360.318   | .0024           | 288 | 1.251       | 0.969 | 0.033 | 0.043 | 15 581.264 |
| D                   | 11        | 467.992   | .023            | 409 | 1.144       | 0.979 | 0.025 | 0.040 | 18 429.529 |
| D ohne UF           | 10        | 411.733   | .0309           | 360 | 1.144       | 0.981 | 0.025 | 0.040 | 17 129.508 |
| D ohne REFL         | 10        | 394.268   | .0106           | 332 | 1.188       | 0.975 | 0.028 | 0.041 | 16 855.751 |
| D ohne UF ohne REFL | 9         | 340.938   | .0174           | 288 | 1.184       | 0.977 | 0.028 | 0.042 | 15 555.949 |
| E                   | 11        | 488.430   | .0042           | 409 | 1.194       | 0.972 | 0.029 | 0.042 | 18 454.495 |
| E ohne UF           | 10        | 417.563   | .020            | 360 | 1.160       | 0.979 | 0.026 | 0.041 | 17 138.724 |
| F                   | 11        | 466.448   | .0259           | 409 | 1.140       | 0.980 | 0.025 | 0.038 | 18 428.625 |
| F ohne UF           | 10        | 410.027   | .0352           | 360 | 1.139       | 0.981 | 0.025 | 0.039 | 17 128.083 |
| G                   | 11        | 525.049   | .0001           | 409 | 1.284       | 0.959 | 0.035 | 0.043 | 18 496.545 |
| G ohne UFL          | 10        | 467.752   | .0001           | 360 | 1.299       | 0.960 | 0.036 | 0.044 | 17 196.193 |
| G ohne REFL         | 10        | 453.069   | .0000           | 332 | 1.365       | 0.951 | 0.040 | 0.045 | 16 924.229 |
| G ohne UF ohne REFL | 9         | 398.359   | .0000           | 288 | 1.383       | 0.952 | 0.046 | 0.041 | 15 624.058 |
| H                   | 11        | 473.526   | .0150           | 409 | 1.158       | 0.977 | 0.026 | 0.040 | 18 438.407 |
| H ohne UF           | 10        | 417.563   | .0195           | 332 | 1.258       | 0.979 | 0.026 | 0.041 | 17 138.724 |
| H ohne REFL         | 10        | 398.674   | .0070           | 360 | 1.107       | 0.973 | 0.029 | 0.042 | 16 863.267 |
| H ohne UF ohne REFL | 9         | 345.401   | .0114           | 288 | 1.199       | 0.975 | 0.029 | 0.042 | 15 563.595 |
| I                   | 11        | 472.760   | .0159           | 409 | 1.156       | 0.978 | 0.026 | 0.041 | 18 434.883 |
| I ohne UF           | 10        | 433.832   | .0046           | 332 | 1.307       | 0.973 | 0.030 | 0.042 | 17 156.780 |
| I ohne REFL         | 10        | 400.627   | .0058           | 360 | 1.113       | 0.972 | 0.030 | 0.043 | 16 862.367 |
| I ohne UF ohne REFL | 9         | 347.120   | .0096           | 288 | 1.205       | 0.974 | 0.030 | 0.044 | 15 562.814 |
| J                   | 11        | 496.291   | .0020           | 409 | 1.213       | 0.969 | 0.030 | 0.042 | 18 463.419 |
| J ohne UF           | 10        | 433.832   | .0046           | 360 | 1.205       | 0.973 | 0.030 | 0.042 | 17 156.780 |
| J ohne REFL         | 10        | 423.199   | .0005           | 332 | 1.275       | 0.963 | 0.034 | 0.044 | 16 890.103 |
| J ohne UF ohne REFL | 9         | 389.340   | .0001           | 288 | 1.352       | 0.956 | 0.039 | 0.045 | 15 614.366 |
| K                   | 11        | 518.549   | .0002           | 409 | 1.268       | 0.961 | 0.034 | 0.043 | 18 488.892 |
| K ohne UF           | 10        | 461.419   | .0002           | 332 | 1.390       | 0.962 | 0.035 | 0.044 | 17 188.610 |
| K ohne REFL         | 10        | 443.986   | .0000           | 360 | 1.233       | 0.954 | 0.038 | 0.045 | 16 914.699 |

|                     |    |         |       |     |       |       |       |       |            |
|---------------------|----|---------|-------|-----|-------|-------|-------|-------|------------|
| K ohne UF ohne REFL | 9  | 389.340 | .0001 | 288 | 1.352 | 0.956 | 0.039 | 0.045 | 15 614.366 |
| L                   | 11 | 541.437 | .0000 | 409 | 1.324 | 0.953 | 0.037 | 0.043 | 18 514.878 |
| L ohne UF           | 10 | 484.041 | .0000 | 332 | 1.458 | 0.954 | 0.039 | 0.044 | 17 214.327 |
| L ohne REFL         | 10 | 466.107 | .0000 | 360 | 1.295 | 0.945 | 0.042 | 0.044 | 16 939.075 |
| L ohne UF ohne REFL | 9  | 411.524 | .0000 | 288 | 1.429 | 0.946 | 0.045 | 0.043 | 15 638.802 |
| M                   | 11 | 513.005 | .0003 | 409 | 1.254 | 0.963 | 0.033 | 0.046 | 18 478.069 |
| M ohne UF           | 10 | 456.038 | .0004 | 332 | 1.374 | 0.964 | 0.034 | 0.047 | 17 177.845 |
| M ohne REFL         | 10 | 440.721 | .0001 | 360 | 1.224 | 0.956 | 0.038 | 0.048 | 16 905.500 |
| M ohne UF ohne REFL | 9  | 386.363 | .0001 | 288 | 1.342 | 0.957 | 0.038 | 0.050 | 15 605.480 |
| N                   | 11 | 540.792 | .0000 | 409 | 1.322 | 0.954 | 0.037 | 0.044 | 18 512.994 |
| N ohne UF           | 10 | 482.640 | .0000 | 332 | 1.454 | 0.955 | 0.038 | 0.045 | 17 211.961 |
| N ohne REFL         | 10 | 467.289 | .0000 | 360 | 1.298 | 0.945 | 0.042 | 0.047 | 16 939.539 |
| N ohne UF ohne REFL | 9  | 411.867 | .0000 | 288 | 1.430 | 0.946 | 0.043 | 0.047 | 15 638.709 |
| O                   | 11 | 506.149 | .0007 | 409 | 1.238 | 0.966 | 0.032 | 0.043 | 18 472.758 |
| O ohne UF           | 10 | 445.824 | .0014 | 332 | 1.343 | 0.968 | 0.032 | 0.044 | 17 168.339 |
| O ohne REFL         | 10 | 432.851 | .0002 | 360 | 1.202 | 0.959 | 0.036 | 0.045 | 16 899.921 |
| O ohne UF ohne REFL | 9  | 375.210 | .0004 | 288 | 1.303 | 0.962 | 0.036 | 0.046 | 15 595.538 |
| P                   | 11 | 531.583 | .0000 | 409 | 1.300 | 0.957 | 0.036 | 0.043 | 18 501.573 |
| P ohne UF           | 10 | 474.656 | .0000 | 332 | 1.430 | 0.958 | 0.037 | 0.044 | 17 201.560 |
| Q                   | 11 | 523.880 | .0001 | 409 | 1.281 | 0.960 | 0.035 | 0.044 | 18 496.017 |
| Q ohne UF           | 10 | 467.269 | .0001 | 332 | 1.407 | 0.960 | 0.036 | 0.045 | 17 196.298 |
| Q ohne REFL         | 10 | 442.873 | .0000 | 360 | 1.230 | 0.955 | 0.038 | 0.044 | 16 914.359 |
| Q ohne UF ohne REFL | 9  | 388.467 | .0001 | 288 | 1.349 | 0.956 | 0.039 | 0.045 | 15 614.240 |
| R                   | 11 | 478.396 | .0101 | 409 | 1.170 | 0.976 | 0.027 | 0.041 | 18 442.067 |
| R ohne UF           | 10 | 422.184 | .0132 | 332 | 1.272 | 0.977 | 0.027 | 0.042 | 17 142.069 |
| R ohne REFL         | 10 | 403.562 | .0043 | 360 | 1.121 | 0.971 | 0.031 | 0.042 | 16 867.178 |
| R ohne UF ohne REFL | 9  | 349.937 | .0073 | 288 | 1.215 | 0.973 | 0.031 | 0.043 | 15 567.197 |
| S                   | 11 | 495.876 | .0021 | 409 | 1.212 | 0.969 | 0.030 | 0.041 | 18 463.116 |
| S ohne UF           | 10 | 439.304 | .0027 | 332 | 1.323 | 0.971 | 0.031 | 0.042 | 17 163.053 |
| S ohne REFL         | 10 | 422.679 | .0005 | 360 | 1.174 | 0.963 | 0.034 | 0.043 | 16 889.489 |
| S ohne UF ohne REFL | 9  | 368.967 | .0009 | 288 | 1.281 | 0.965 | 0.035 | 0.044 | 15 589.737 |
| T                   | 11 | 504.006 | .0009 | 409 | 1.232 | 0.967 | 0.032 | 0.042 | 18 471.131 |
| T ohne UF           | 10 | 440.401 | .0024 | 332 | 1.327 | 0.970 | 0.031 | 0.043 | 17 163.346 |
| T ohne REFL         | 10 | 431.370 | .0002 | 360 | 1.198 | 0.959 | 0.036 | 0.044 | 16 898.283 |
| T ohne UF ohne REFL | 9  | 370.005 | .0008 | 288 | 1.285 | 0.964 | 0.035 | 0.044 | 15 590.123 |
| U                   | 11 | 523.473 | .0001 | 409 | 1.280 | 0.960 | 0.035 | 0.044 | 18 495.871 |
| U ohne UF           | 10 | 466.088 | .0001 | 332 | 1.404 | 0.961 | 0.036 | 0.045 | 17 195.270 |
| V                   | 11 | 520.101 | .0002 | 409 | 1.272 | 0.961 | 0.034 | 0.046 | 18 488.618 |
| V ohne UF           | 10 | 463.414 | .0002 | 332 | 1.396 | 0.962 | 0.035 | 0.047 | 17 188.652 |

|                      |    |         |       |     |       |       |       |       |            |
|----------------------|----|---------|-------|-----|-------|-------|-------|-------|------------|
| V ohne REFL          | 10 | 449.372 | .0000 | 360 | 1.248 | 0.952 | 0.039 | 0.048 | 16 917.605 |
| V ohne UF ohne REFL  | 9  | 394.943 | .0000 | 288 | 1.371 | 0.954 | 0.040 | 0.049 | 15 617.439 |
| X                    | 11 | 525.321 | .0001 | 409 | 1.284 | 0.959 | 0.035 | 0.044 | 18 498.077 |
| X ohne UF            | 10 | 468.310 | .0001 | 332 | 1.411 | 0.960 | 0.036 | 0.045 | 17 197.906 |
| X ohne REFL          | 10 | 449.361 | .0000 | 360 | 1.248 | 0.952 | 0.039 | 0.045 | 16 921.115 |
| X ohne UF ohne REFL  | 9  | 394.715 | .0000 | 288 | 1.371 | 0.954 | 0.040 | 0.045 | 15 620.783 |
| Y                    | 11 | 505.312 | .0008 | 409 | 1.235 | 0.966 | 0.032 | 0.043 | 18 471.499 |
| Y ohne UF            | 10 | 441.999 | .0020 | 332 | 1.331 | 0.970 | 0.031 | 0.043 | 17 163.690 |
| Y ohne REFL          | 10 | 431.023 | .0002 | 360 | 1.197 | 0.960 | 0.036 | 0.044 | 16 896.677 |
| Y ohne UF ohne REFL  | 9  | 371.290 | .0007 | 288 | 1.289 | 0.964 | 0.035 | 0.045 | 15 589.944 |
| Z                    | 11 | 486.680 | .0049 | 409 | 1.190 | 0.973 | 0.029 | 0.047 | 18 449.731 |
| Z ohne UF            | 10 | 430.317 | .0064 | 332 | 1.296 | 0.974 | 0.029 | 0.049 | 17 149.684 |
| Z ohne REFL          | 10 | 410.998 | .0020 | 360 | 1.142 | 0.968 | 0.032 | 0.048 | 16 873.666 |
| Z ohne UF ohne REFL  | 9  | 357.438 | .0033 | 288 | 1.241 | 0.970 | 0.032 | 0.050 | 15 573.923 |
| AA                   | 11 | 552.868 | .0000 | 409 | 1.352 | 0.949 | 0.039 | 0.048 | 18 525.036 |
| AA ohne UF           | 10 | 494.677 | .0000 | 332 | 1.490 | 0.950 | 0.040 | 0.050 | 17 223.760 |
| AA ohne REFL         | 10 | 477.842 | .0000 | 360 | 1.327 | 0.940 | 0.044 | 0.050 | 16 949.658 |
| AA ohne UF ohne      | 9  | 422.659 | .0000 | 288 | 1.468 | 0.942 | 0.045 | 0.051 | 15 648.891 |
| AB                   | 11 | 530.004 | .0000 | 409 | 1.296 | 0.957 | 0.036 | 0.052 | 18 498.307 |
| AB ohne UF           | 10 | 467.473 | .0001 | 360 | 1.299 | 0.960 | 0.036 | 0.054 | 17 192.338 |
| AB ohne REFL         | 10 | 456.183 | .0000 | 332 | 1.374 | 0.949 | 0.040 | 0.053 | 16 924.669 |
| AB_ohne UF_ohne      | 9  | 395.652 | .0000 | 288 | 1.374 | 0.953 | 0.040 | 0.055 | 15 618.130 |
| AC                   | 11 | 468.437 | .0223 | 409 | 1.145 | 0.979 | 0.025 | 0.040 | 18 431.608 |
| AC ohne UF           | 10 | 412.094 | .0301 | 332 | 1.241 | 0.981 | 0.025 | 0.041 | 17 131.465 |
| AC ohne REFL         | 10 | 394.893 | .0100 | 360 | 1.097 | 0.974 | 0.029 | 0.042 | 16 857.898 |
| AC ohne UF ohne      | 9  | 341.231 | .0169 | 288 | 1.185 | 0.977 | 0.028 | 0.042 | 15 557.847 |
| AD                   | 11 | 542.821 | .0000 | 409 | 1.327 | 0.953 | 0.038 | 0.055 | 18 510.277 |
| AD ohne UF           | 10 | 486.26  | .0000 | 360 | 1.351 | 0.953 | 0.039 | 0.057 | 17 210.390 |
| AD ohne REFL         | 10 | 468.437 | .0000 | 332 | 1.411 | 0.944 | 0.042 | 0.058 | 16 935.927 |
| AD ohne UF ohne      | 9  | 414.335 | .0000 | 288 | 1.439 | 0.945 | 0.044 | 0.060 | 15 636.121 |
| AE                   | 11 | 479.779 | .0089 | 409 | 1.173 | 0.975 | 0.027 | 0.041 | 18 442.957 |
| AE ohne UF           | 10 | 420.005 | .0159 | 360 | 1.167 | 0.978 | 0.027 | 0.041 | 17 138.932 |
| AE ohne REFL         | 10 | 406.902 | .0031 | 332 | 1.226 | 0.969 | 0.031 | 0.043 | 16 869.957 |
| AE ohne UF ohne REFL | 9  | 350.029 | .0072 | 288 | 1.215 | 0.973 | 0.031 | 0.043 | 15 566.319 |
| AF                   | 11 | 510.265 | .0005 | 409 | 1.248 | 0.964 | 0.033 | 0.047 | 18 476.377 |
| AF ohne UF           | 10 | 453.626 | .0006 | 360 | 1.260 | 0.965 | 0.034 | 0.048 | 17 176.291 |
| AF ohne REFL         | 11 | 521.606 | .0001 | 409 | 1.275 | 0.960 | 0.035 | 0.044 | 18 489.860 |
| AF ohne UF ohne REFL | 10 | 463.564 | .0002 | 360 | 1.288 | 0.962 | 0.035 | 0.044 | 17 188.629 |
| AG                   | 11 | 508.167 | .0006 | 409 | 1.242 | 0.965 | 0.032 | 0.043 | 18 474.032 |

---

|            |    |         |       |     |       |       |       |       |            |
|------------|----|---------|-------|-----|-------|-------|-------|-------|------------|
| AG ohne UF | 10 | 447.276 | .0012 | 360 | 1.242 | 0.968 | 0.032 | 0.044 | 17 169.309 |
|------------|----|---------|-------|-----|-------|-------|-------|-------|------------|

---

*Anmerkungen:* KFA in der Sekundär-Stichprobe berechnet, Modell A = Gesamtfaktoren-Modell, Model B = 12-faktorielles Modell. df = Freiheitsgrade, CFI = comparative fitindex, RMSEA = rootmean square error of approximation, SRMR = standardized root mean residual, BIC = Bayesian Information Criterion.
