# Supplementary material for: Der Inno-Lehre
Source: Atypon-hosted journal article supplement (doi:10.1026/0012-1924/a000256), 2020-10-01
Supplement: 0012-1924_a000256_esm7.pdf [file 0012-1924_a000256_esm7.pdf]

*Elektronisches Supplement 7. Mplus-Inputs zur Messinvarianzprüfung*

DATA: file = Grundlage Berechnungen Messinvarianz.dat;

Variable: names =

! Auf die Auflistung aller Variablen im Datensatz wird aufgrund von Platzmangel verzichtet

! Variable, die die Gruppen aufteilt

role3;

grouping is role3(1=1 2=2);

usevariables =

! Auf die Auflistung der verwendeten Variablen im Datensatz wird aufgrund von Platzmangel verzichtet

missing = all(-99);

define: analysis: !type = ;

estimator = MLR;

MODEL:

WS BY

S1\_ws11@1 (1)

S1\_ws1\* (2)

S1\_ws10\* (3) ;

[S1\_ws11\*]; [S1\_ws1\*]; [S1\_ws10\*];

S1\_ws11\* ; S1\_ws1\* ; S1\_ws10\* ;

WS\*;

[WS@0];

BQ BY

S2\_bq5@1 (4)

S2\_bq3\* (5)

S2\_bq6\* (6) ;

[S2\_bq5\*]; [S2\_bq3\*]; [S2\_bq6\*];

S2\_bq5\* ; S2\_bq3\* ; S2\_bq6\* ;

BQ\*;

[BQ@0];

VN BY

S3\_vn1@1 (7)

S3\_vn8\* (8)

S3\_vn5\* (9);

[S3\_vn1\*]; [S3\_vn8\*]; [S3\_vn5\*];

S3\_vn1\* ; S3\_vn8\* ; S3\_vn5\* ;

VN\*;

[VN@0];

AF BY

S4\_af9@1 (10)

S4\_af8\* (11)

S4\_af5\* (12);

[S4\_af9\*]; [S4\_af8\*]; [S4\_af5\*];

S4\_af9\* ; S4\_af8\* ; S4\_af5\* ;

AF\*;

[AF@0];

DTMO BY

S25dt5@1 (13)

S5\_dt4\* (14)

S5\_dt6\* (15);

[S5\_dt5\*]; [S5\_dt4\*]; [S5\_dt6\*];

S5\_dt5\* ; S5\_dt4\* ; S5\_dt6\* ;

DT\_MO\*;

[DT\_MO@0];

DTI BY

S6\_dt14@1 (16)

S6\_dt13\* (17);

[S2a\_dt5\*]; [S6\_dt13\*];

S2a\_dt5\* ; S6\_dt13\* ;

DTI\*;

[DTI@0];

QL BY

S7\_ql3@1 (18)

S7\_ql1\* (19)

S7\_ql8\* (20);

[S7\_ql3\*]; [S7\_ql1\*]; [S7\_ql8\*];

S7\_ql3\* ; S7\_ql1\* ; S7\_ql8\* ;

QL\*;

[QL@0];

DTFO BY

S8\_dt9@1 (21)

S8\_dt10\* (22)

S8\_dt8\* (23);

[S8\_dt9\*]; [S8\_dt10\*]; [S8\_dt8\*];

S8\_dt9\* ; S8\_dt10\* ; S8\_dt8\* ;

DTFO\*;

[DTFO@0];

REFS BY

S9\_ref10@1 (24)

S9\_ref7\* (25);

[S9\_ref10\*]; [S9\_ref7\*];

S9\_ref10\* ; S9\_ref7\* ;

REFS\*;

[REFS@0];

IPI BY

S10\_ipi4r@1 (26)

S10\_ipi5r\* (27);

[S10\_ipi4r\*]; [S10\_ipi5r\*];

S10\_ipi4r\* ; S10\_ipi5r\* ;

IPI\*;

[IPI@0];

ZL BY

S11\_zl1@1 (28)

S11\_zl6\* (29);

[S11\_zl1\*]; [S11\_zl6\*];

S11\_zl1\* ; S11\_zl6\* ;

ZL\*;

[ZL@0];

REFL BY

S12\_ref9@1 (30)

S12\_ref6\* (31)

S12\_ref2\* (32);

[S12\_ref9\*]; [S12\_ref6\*]; [S12\_ref2\*];

S12\_ref9\* ; S12\_ref6\* ; S12\_ref2\* ;

REFL\*;

[REFL@0];

MODEL 2:

WS BY

S1\_ws11@1

S1\_ws1\*

S1\_ws10\*;

[S1\_ws11\*]; [S1\_ws1\*]; [S1\_ws10\*];

S1\_ws11\* ; S1\_ws1\* ; S1\_ws10\* ;

WS\*;

[WS@0];

BQ BY

S2\_bq5@1

S2\_bq3\*

S2\_bq6\* ;

[S2\_bq5\*]; [S2\_bq3\*]; [S2\_bq6\*];

S2\_bq5\* ; S2\_bq3\* ; S2\_bq6\* ;

BQ\*;  
[BQ@0];

VN BY

S3\_vn1@1  
S3\_vn8\*  
S3\_vn5\* ;  
[S3\_vn1\*] ; [ S3\_vn8\*] ; [S3\_vn5\*] ;  
S3\_vn1\* ; S3\_vn8\* ; S3\_vn5\* ;  
VN\*;  
[VN@0];

AF BY

S4\_af9@1  
S4\_af8\*  
S4\_af5\* ;  
[S4\_af9\*] ; [S4\_af8\*] ; [S4\_af5\*] ;  
S4\_af9\* ; S4\_af8\* ; S4\_af5\* ;  
AF\*;  
[AF@0];

DTMO BY

S5\_dt5@1  
S5\_dt4\*  
S5\_dt6\* ;  
[S5\_dt5\*] ; [S5\_dt4\*] ; [ S5\_dt6\*] ;  
S5\_dt5\* ; S5\_dt4\* ; S5\_dt6\* ;  
DT\_MO\*;  
[DT\_MO@0];

DTI BY

S6\_dt14@1  
S6\_dt13\* ;  
[S6\_dt5\*] ; [S6\_dt13\*] ;

S6\_dt5\* ; S6\_dt13\* ;

DTI\*;

[DTI@0];

QL BY

S7\_ql3@1

S7\_ql1\*

S7\_ql8\* ;

[S7\_ql3\*] ; [S7\_ql1\*] ; [S7\_ql8\*] ;

S7\_ql3\* ; S7\_ql1\* ; S7\_ql8\* ;

QL\*;

[QL@0];

DTFO BY

S8\_dt9@1

S8\_dt10\*

S8\_dt8\* ;

[S8\_dt9\*] ; [S8\_dt10\*] ; [S8\_dt8\*] ;

S8\_dt9\* ; S8\_dt10\* ; S8\_dt8\* ;

DTFO\*;

[DTFO@0];

REFS BY

S9\_ref10@1

S9\_ref7\* ;

[S9\_ref10\*] ; [S9\_ref7\*] ;

S9\_ref10\* ; S9\_ref7\* ;

REFS\*;

[REFS@0];

IPI BY

S10\_ipi4r@1

S10\_ipi5r\* ;

[S10\_ipi4r\*] ; [S10\_ipi5r\*] ;

S10\_ipi4r\*; S10\_ipi5r\* ;

IPI\*;

[IPI@0];

ZL BY

S11\_zl1@1

S11\_zl6\* ;

[S11\_zl1\*]; [S11\_zl6\*];

S11\_zl1\* ; S11\_zl6\* ;

ZL\*;

[ZL@0];

REFL BY

S12\_ref9@1

S12\_ref6\*

S12\_ref2\*;

[S12\_ref9\*]; [S12\_ref6\*]; [S12\_ref2\*];

S12\_ref9\* ; S12\_ref6\* ; S12\_ref2\* ;

REFL\*;

[REFL@0];

OUTPUT:

tech1;

tech4;

stdyx;

sampstat;

MODINDICES STANDARDIZED;

DATA: file = Grundlage Berechnungen Messinvarianz.dat;

Variable: names =

! Auf die Auflistung aller Variablen im Datensatz wird aufgrund von Platzmangel verzichtet

! Variable, die die Gruppen aufteilt

role3;

grouping is role3(1=1 2=2);

usevariables =

! Auf die Auflistung der verwendeten Variablen im Datensatz wird aufgrund von Platzmangel verzichtet

missing = all(-99);

define: analysis: !type = ;

estimator = MLR;

MODEL:

WS BY

S1\_ws11\* (1)

S1\_ws1\* (2)

S1\_ws10\* (3);

[S1\_ws11\*]; [S1\_ws1\*]; [S1\_ws10\*];

S1\_ws11\* ; S1\_ws1\* ; S1\_ws10\* ;

WS@1;

[WS@0];

BQ BY

S2\_bq5\* (4)

S2\_bq3\* (5)

S2\_bq6\* (6);

[S2\_bq5\*]; [S2\_bq3\*]; [S2\_bq6\*];

S2\_bq5\* ; S2\_bq3\* ; S2\_bq6\* ;

BQ@1;

[BQ@0];

VN BY



S3\_vn1\* (7)

S3\_vn8\* (8)

S3\_vn5\* (9);

[S3\_vn1\*]; [S3\_vn8\*]; [S3\_vn5\*];

S3\_vn1\* ; S3\_vn8\* ; S3\_vn5\* ;

VN@1;

[VN@0];

AF BY

S4\_af9\* (10)

S4\_af8\* (11)

S4\_af5\* (12);

[S4\_af9\*]; [S4\_af8\*]; [S4\_af5\*];

S4\_af9\* ; S4\_af8\* ; S4\_af5\* ;

AF@1;

[AF@0];

DTMO BY

S5\_dt5\* (13)

S5\_dt4\* (14)

S5\_dt6\* (15);

[S5\_dt5\*]; [S5\_dt4\*]; [S5\_dt6\*];

S5\_dt5\* ; S5\_dt4\* ; S5\_dt6\* ;

DT\_MO@1;

[DT\_MO@0];

DTI BY

S6\_dt14\* (16)

S6\_dt13\* (17);

[S6\_dt5\*]; [S6\_dt13\*];

S6\_dt5\* ; S6\_dt13\* ;

DTI@1;

[DTI@0];

QL BY

S7\_ql3\* (18)

S7\_ql1\* (19)

S7\_ql8\* (20) ;

[S7\_ql3\*] ; [S7\_ql1\*] ; [S7\_ql8\*] ;

S7\_ql3\* ; S7\_ql1\* ; S7\_ql8\* ;

QL@1;

[QL@0];

DTFO BY

S8\_dt9\* (21)

S8\_dt10\* (22)

S8\_dt8\* (23) ;

[S8\_dt9\*] ; [S8\_dt10\*] ; [S8\_dt8\*] ;

S8\_dt9\* ; S8\_dt10\* ; S8\_dt8\* ;

DTFO@1;

[DTFO@0];

REFS BY

S9\_ref10\* (24)

S9\_ref7\* (25);

[S9\_ref10\*] ; [S9\_ref7\*] ;

S9\_ref10\* ; S9\_ref7\* ;

REFS@1;

[REFS@0];

IPI BY

S10\_ipi4r\* (26)

S10\_ipi5r\* (27) ;

[S10\_ipi4r\*] ; [S10\_ipi5r\*] ;

S10\_ipi4r\* ; S10\_ipi5r\* ;

IPI@1;

[IPI@0];

ZL BY

S11\_zl1\* (28)

S11\_zl6\* (29);

[S11\_zl1\*]; [S11\_zl6\*];

S11\_zl1\* ; S11\_zl6\* ;

ZL@1;

[ZL@0];

REFL BY

S12\_ref9\* (30)

S12\_ref6\* (31)

S12\_ref2\* (32);

[S12\_ref9\*]; [S12\_ref6\*]; [S12\_ref2\*];

S12\_ref9\* ; S12\_ref6\* ; S12\_ref2\* ;

REFL@1;

[REFL@0];

MODEL 2:

WS BY

S1\_ws11\* (1)

S1\_ws1\* (2)

S1\_ws10\* (3);

[S1\_ws11\*]; [S1\_ws1\*]; [S1\_ws10\*];

S1\_ws11\* ; S1\_ws1\* ; S1\_ws10\* ;

WS\*;

[WS@0];

BQ BY

S2\_bq5\* (4)

S2\_bq3\* (5)

S2\_bq6\* (6);

[S2\_bq5\*]; [S2\_bq3\*]; [S2\_bq6\*];

S2\_bq5\* ; S2\_bq3\* ; S2\_bq6\* ;

BQ\*;

[BQ@0];

VN BY

S3\_vn1\* (7)

S3\_vn8\* (8)

S3\_vn5\* (9);

[S3\_vn1\*]; [S3\_vn8\*]; [S3\_vn5\*];

S3\_vn1\* ; S3\_vn8\* ; S3\_vn5\* ;

VN\*;

[VN@0];

AF BY

S4\_af9\* (10)

S4\_af8\* (11)

S4\_af5\* (12);

[S4\_af9\*]; [S4\_af8\*]; [S4\_af5\*];

S4\_af9\* ; S4\_af8\* ; S4\_af5\* ;

AF\*;

[AF@0];

DTMO BY

S5\_dt5\* (13)

S5\_dt4\* (14)

S5\_dt6\* (15);

[S5\_dt5\*]; [S5\_dt4\*]; [S5\_dt6\*];

S5\_dt5\* ; S5\_dt4\* ; S5\_dt6\* ;

DT\_MO\*;

[DT\_MO@0];

DTI BY

S6\_dt14\* (16)

S6\_dt13\* (17);

[S6\_dt5\*]; [S6\_dt13\*];

S6\_dt5\* ; S6\_dt13\* ;

DTI\*;

[DTI@0];

#### QL BY

S7\_ql3\* (18)

S7\_ql1\* (19)

S7\_ql8\* (20);

[S7\_ql3\*]; [S7\_ql1\*]; [S7\_ql8\*];

S7\_ql3\* ; S7\_ql1\* ; S7\_ql8\* ;

QL\*;

[QL@0];

#### DTFO BY

S8\_dt9\* (21)

S8\_dt10\* (22)

S8\_dt8\* (23);

[S8\_dt9\*]; [S8\_dt10\*]; [S8\_dt8\*];

S8\_dt9\* ; S8\_dt10\* ; S8\_dt8\* ;

DTFO\*;

[DTFO@0];

#### REFS BY

S9\_ref10\* (24)

S9\_ref7\* (25) ;

[S9\_ref10\*]; [S9\_ref7\*];

S9\_ref10\* ; S9\_ref7\* ;

REFS\*;

[REFS@0];

#### IPI BY

S10\_ipi4r\* (26)

S10\_ipi5r\* (27) ;

[S10\_ipi4r\*]; [S10\_ipi5r\*];

S10\_ipi4r\* ; S10\_ipi5r\* ;

IPI\*;

[IPI@0];

ZL BY

S11\_zl1\* (28)

S11\_zl6\* (29);

[S11\_zl1\*]; [S11\_zl6\*];

S11\_zl1\* ; S11\_zl6\* ;

ZL\*;

[ZL@0];

REFL BY

S12\_ref9\* (30)

S12\_ref6\* (31)

S12\_ref2\* (32);

[S12\_ref9\*]; [S12\_ref6\*]; [S12\_ref2\*];

S12\_ref9\* ; S12\_ref6\* ; S12\_ref2\* ;

REFL\*;

[REFL@0];

OUTPUT:

tech1;

tech4;

stdyx;

sampstat;

MODINDICES STANDARDIZED;

OUTPUT:

tech1;

tech4;

stdyx;

sampstat;

MODINDICES STANDARDIZED;



DATA: file = Grundlage Berechnungen Messinvarianz.dat;

Variable: names =

! Auf die Auflistung aller Variablen im Datensatz wird aufgrund von Platzmangel verzichtet

! Variable, die die Gruppen aufteilt

role3;

grouping is role3(1=1 2=2);

usevariables =

! Auf die Auflistung der verwendeten Variablen im Datensatz wird aufgrund von Platzmangel verzichtet

missing = all(-99);

define: analysis: !type = ;

estimator = MLR;

MODEL:

WS BY

S1\_ws11\* (1)

S1\_ws1\* (2)

S1\_ws10\* (3) ;

[S1\_ws11\*] (a); [S1\_ws1\*] (b); [S1\_ws10\*] (c) ;

S1\_ws11\* (ba); S1\_ws1\* (bb) ; S1\_ws10\* (bc) ;

WS@1;

[WS@0];

BQ BY

S2\_bq5\* (4)

S2\_bq3\* (5)

S2\_bq6\* (6);

[S2\_bq5\*] (d); [S2\_bq3\*] (e); [S2\_bq6\*] (f);

S2\_bq5\* (bd); S2\_bq3\* (be); S2\_bq6\* (bf);

BQ@1;

[BQ@0];

VN BY



S3\_vn1\* (7)  
S3\_vn8\* (8)  
S3\_vn5\* (3);  
[S3\_vn1\*] (g); [ S3\_vn8\*] (h) ; [S3\_vn5\*] (i) ;  
S3\_vn1\* (bg); S3\_vn8\* (bh); S3\_vn5\* (bi);  
VN@1;  
[VN@0];

AF BY

S4\_af9\* (10)  
S4\_af8\* (11)  
S4\_af5\* (12);  
[S4\_af9\*] (j); [S4\_af8\*] (k) ; [S4\_af5\*] (l) ;  
S4\_af9\*(bj) ; S4\_af8\* (bk); S4\_af5\* (bl);  
AF@1;  
[AF@0];

DTMO BY

S5\_dt5\* (13)  
S5\_dt4\* (14)  
S5\_dt6\* (15);  
[S5\_dt5\*] (m); [S5\_dt4\*] (n); [ S5\_dt6\*] (o) ;  
S5\_dt5\* (bm); S5\_dt4\* (bn) ; S5\_dt6\* (bo);  
DT\_MO@1;  
[DT\_MO@0];

DTI BY

S6\_dt14\* (16)  
S6\_dt13\* (17) ;  
[S6\_dt6\*] (p) ; [S6\_dt13\*] (q);  
S6\_dt6\* (bp); S6\_dt13\* (bq) ;  
DTI@1;  
[DTI@0];

QL BY

S7\_ql3\* (18)

S7\_ql1\* (19)

S7\_ql8\* (20) ;

[S7\_ql3\*] (r) ; [S7\_ql1\*] (s) ; [S7\_ql8\*] (t) ;

S7\_ql3\* (br) ; S7\_ql1\* (bs) ; S7\_ql8\* (bt) ;

QL@1 ;

[QL@0] ;

DTFO BY

S8\_dt9\* (21)

S8\_dt10\* (22)

S8\_dt8\* (23) ;

[S8\_dt9\*] (u) ; [S8\_dt10\*] (v) ; [S8\_dt8\*] (w) ;

S8\_dt9\* (bu) ; S8\_dt10\* (bv) ; S8\_dt8\* (bw) ;

DTFO@1 ;

[DTFO@0] ;

REFS BY

S9\_ref10\* (29)

S9\_ref7\* (25) ;

[S9\_ref10\*] (x) ; [S9\_ref7\*] (y) ;

S9\_ref10\* (bx) ; S9\_ref7\* (by) ;

REFS@1 ;

[REFS@0] ;

IPI BY

S10\_ipi4r\* (210)

S10\_ipi5r\* (27) ;

[S10\_ipi4r\*] (z) ; [S10\_ipi5r\*] (aa) ;

S10\_ipi4r\* (bz) ; S10\_ipi5r\* (ca) ;

IPI@1 ;

[IPI@0] ;

ZL BY

S11\_zl1\* (28)

S11\_zl6\* (29);

[S11\_zl1\*] (ab) ; [S11\_zl6\*] (ac);

S11\_zl1\* (cb); S11\_zl6\* (ce) ;

ZL@1;

[ZL@0];

REFL BY

S12\_ref9\* (30)

S12\_ref6\* (31)

S12\_ref2\* (32);

[S12\_ref9\*] (ad) ; [S12\_ref6\*] (ae); [S12\_ref2\*] (af) ;

S12\_ref9\* (cd); S12\_ref6\*(ce) ; S12\_ref2\* (cf);

REFL@1;

[REFL@0];

MODEL 2:

WS BY

S1\_ws11\* (1)

S1\_ws1\* (2)

S1\_ws10\* (3) ;

[S1\_ws11\*] (a); [S1\_ws1\*] (b); [S1\_ws10\*] (c) ;

S1\_ws11\* ; S1\_ws1\* ; S1\_ws10\* ;

WS\*;

[WS@0];

BQ BY

S2\_bq5\* (4)

S2\_bq3\* (5)

S2\_bq6\* (6);

[S2\_bq5\*] (d) ; [S2\_bq3\*] (e) ; [S2\_bq6\*] (f);

S2\_bq5\* ; S2\_bq3\* ; S2\_bq6\* ;

BQ\*;

[BQ@0];

VN BY

S3\_vn1\* (7)

S3\_vn8\* (8)

S3\_vn5\* (9);

[S3\_vn1\*] (g); [ S3\_vn8\*] (h); [S3\_vn5\*] (i) ;

S3\_vn1\* ; S3\_vn8\* ; S3\_vn5\* ;

VN\*;

[VN@0];

AF BY

S4\_af9\* (10)

S4\_af8\* (11)

S4\_af5\* (12);

[S4\_af9\*] (j) ; [S4\_af8\*] (k); [S4\_af5\*] (l);

S4\_af9\* ; S4\_af8\* ; S4\_af5\* ;

AF\*;

[AF@0];

DTMO BY

S5\_dt5\* (13)

S5\_dt4\* (14)

S5\_dt6\* (15);

[S5\_dt5\*] (m); [S5\_dt4\*] (n) ; [ S5\_dt6\*] (o) ;

S5\_dt5\* ; S5\_dt4\* ; S5\_dt6\* ;

DT\_MO\*;

[DT\_MO@0];

DTI BY

S6\_dt14\* (16)

S6\_dt13\* (17);

[S6\_dt5\*] (p) ; [S6\_dt13\*] (q) ;

S6\_dt5\* ; S6\_dt13\* ;

DTI\*;

[DTI@0];

QL BY

S7\_ql3\* (18)

S7\_ql1\* (19)

S7\_ql8\* (20);

[S7\_ql3\*] (r); [S7\_ql1\*] (s); [S7\_ql8\*] (t);

S7\_ql3\* ; S7\_ql1\* ; S7\_ql8\* ;

QL\*;

[QL@0];

DTFO BY

S8\_dt9\* (21)

S8\_dt10\* (22)

S8\_dt8\* (23);

[S8\_dt9\*] (u); [S8\_dt10\*] (v); [S8\_dt8\*] (w);

S8\_dt9\* ; S8\_dt10\* ; S8\_dt8\* ;

DTFO\*;

[DTFO@0];

REFS BY

S9\_ref10\* (24)

S9\_ref7\* (25) ;

[S9\_ref10\*] (x); [S9\_ref7\*] (y);

S9\_ref10\* ; S9\_ref7\* ;

REFS\*;

[REFS@0];

IPI BY

S10\_ipi4r\* (26)

S10\_ipi5r\* (27) ;

[S10\_ipi4r\*] (z); [S10\_ipi5r\*] (aa);

S10\_ipi4r\* ; S10\_ipi5r\* ;

IPI\*;

[IPI@0];

ZL BY

S11\_zl1\* (28)

S11\_zl6\* (29);

[S11\_zl1\*] (ab); [S11\_zl6\*] (ac);

S11\_zl1\* ; S11\_zl6\* ;

ZL\*;

[ZL@0];

REFL BY

S4\_ref12\* (30)

S4\_ref6\* (31)

S4\_ref2\* (32);

[S4\_ref12\*] (ad) ; [S4\_ref6\*] (ae); [S4\_ref2\*] (af);

S4\_ref12\* ; S4\_ref6\* ; S4\_ref2\* ;

REFL\*;

[REFL@0];

OUTPUT:

tech1;

tech4;

stdyx;

sampstat;

MODINDICES STANDARDIZED;
