# Supplementary material for: Der Inno-Lehre
Source: Atypon-hosted journal article supplement (doi:10.1026/0012-1924/a000256), 2020-10-01
Supplement: 0012-1924_a000256_esm8.pdf [file 0012-1924_a000256_esm8.pdf]

Elektronisches Supplement 8. Ergebnisse der Messinvarianzprüfung

| Modell                       | $\chi^2$ | $p$  | df  | $\chi^2/df$ | CFI   | RMSEA<br>[CI]             | SRMR  | $\Delta$ CFI | $\Delta$ RMSEA | $\Delta$ SRMR | TRd/ $\Delta$ df | $p$        |
|------------------------------|----------|------|-----|-------------|-------|---------------------------|-------|--------------|----------------|---------------|------------------|------------|
| Konfigurale<br>Messinvarianz | 989.107  | .000 | 797 | 1.24        | 0.980 | 0.026<br>[0.020<br>0.031] | 0.037 | -            | -              | -             | -                | -          |
| Metrische<br>Messinvarianz   | 1013.024 | .000 | 817 | 1.32        | 0.980 | 0.026<br>[0.020<br>0.031] | 0.039 | 0            | 0              | .002          | 23.966/20        | >.05       |
| Skalare<br>Messinvarianz     | 1201.007 | .000 | 848 | 1.42        | 0.963 | 0.034<br>[0.029<br>0.038] | 0.051 | -.017        | .008           | .012          | 122.625/19       | $\leq$ .00 |

Anmerkung: TRd = Satorra-Bentler-skalierte  $\chi^2$ - Differenz;  $\Delta$ df = Differenz der Freiheitsgrade. df = Freiheitsgrade, CFI = comparative fitindex, RMSEA = rootmean square error of approximation, SRMR = standardized root mean residual,  $\Delta$  = Differenz der jeweiligen Werte verschiedener Modelle.
