# Supplementary material for: Der Inno-Lehre
Source: Atypon-hosted journal article supplement (doi:10.1026/0012-1924/a000256), 2020-10-01
Supplement: 0012-1924_a000256_esm9.pdf [file 0012-1924_a000256_esm9.pdf]

Elektronisches Supplement 9. Korrelationen der Skalen des Inno-Lehre (IL) mit den Validierungsskalen

| Skala | OCQ-G <sup>a</sup> | ABB <sup>a</sup> | ATI-R <sup>a</sup> | LZ <sup>b</sup> | SZ <sup>b</sup> | TIPICO <sup>a</sup> | TIPICO <sup>b</sup> | TIPIEX <sup>a</sup> | TIPIEX <sup>b</sup> | TIPINE <sup>a</sup> | TIPINE <sup>b</sup> |
|-------|--------------------|------------------|--------------------|-----------------|-----------------|---------------------|---------------------|---------------------|---------------------|---------------------|---------------------|
| 1     | .55**              | .57**            | .33**              | .34**           | .35**           | .02                 | .12**               | .08                 | .21**               | .15**               | .02                 |
| 2     | .43**              | .32**            | .29**              | .38**           | .46**           | .22**               | .15**               | .18*                | .21**               | .24**               | .21**               |
| 3     | .34**              | .27**            | .38**              | .32**           | .36**           | -.05                | .13**               | .29**               | .23**               | .13**               | .07                 |
| 4     | .46**              | .39**            | .29**              | .31**           | .32**           | .17*                | .13**               | .16*                | .23**               | .17**               | .09                 |
| 5     | .35**              | .22**            | .23**              | .28**           | .31**           | .10                 | .15**               | .13                 | .26**               | .12**               | .05                 |
| 6     | .38**              | .36**            | .42**              | .41**           | .29**           | .15*                | .10*                | .14*                | .29**               | .12**               | .07                 |
| 7     | .35**              | .42**            | .19**              | .32**           | .29**           | -.01                | .13**               | .12                 | .25**               | .11**               | .11                 |
| 8     | .19**              | .15*             | .09                | .38**           | .32**           | .02                 | .14**               | .13                 | .26**               | .15**               | .03                 |
| 9     | .21**              | .11              | .23**              | .20**           | .20*            | .07                 | .07                 | .00                 | .10**               | .08*                | .10                 |
| 10    | .31**              | .43**            | .13                | .15**           | .46**           | .28**               | .22**               | .14*                | .13**               | .22**               | .22**               |
| 11    | .36**              | .33**            | .18*               | .33**           | .38**           | .20**               | .13**               | .19**               | .15**               | .19**               | .11                 |
| 12    | .43**              | .34**            | .39**              | .31**           | .28**           | -.01                | .15**               | .20**               | .17**               | .09*                | -.04                |

Anmerkungen: OCQ-G = Organisational Commitment, ABB = Arbeitsbeschreibungsbogen, ATI-R = Studierendenorientierter Lehrstil, LZ = Leistungszufriedenheit, SZ = Studienzufriedenheit, TIPICO = Skala Gewissenhaftigkeit des TIPI, TIPIEX = Skala Extraversion des TIPI, TIPINE = Skala Neurotizismus des TIPI. Hohe Korrelationen > .50, mittlere Korrelationen > .30, kleine Korrelationen > .10 (Bortz & Döring, 2006). <sup>a</sup> Subgruppe der Lehrenden in der Gesamtstichprobe, <sup>b</sup> Subgruppe der Studierenden in der Gesamtstichprobe. \* $p \leq .05$ . \*\* $p \leq .01$ . \*\*\* $p \leq .001$ . Spearman-Korrelation, listweise Fallausschluss.
